# Supplementary material for: Right Heart Catheterization: An Antecubital Vein Approach to Reduce Fluoroscopy Time, Radiation Dose, and Guidewires Need
Source: MDPI journal article supplement (doi:10.3390/jcm12165382), 2023-08-18
Supplement: s1 [file s1]

**Table S1.** Procedural characteristics for femoral, internal jugular, left antecubital and right antecubital venous accesses according to the five operators.

| M.V.                                 | Proximal (n = 76) |                  |                           | Antecubital (n = 196)      |                            | p-Value  |
|--------------------------------------|-------------------|------------------|---------------------------|----------------------------|----------------------------|----------|
|                                      | All (n = 272)     | Femoral (n = 56) | Internal Jugular (n = 20) | Left Antecubital (n = 108) | Right Antecubital (n = 88) |          |
| Radiation dose (cGy/m <sup>2</sup> ) | 40 (19–69)        | 92 (47–195)      | 118 (27–188)              | 31 (15–55)                 | 30 (11–57)                 | <0.001 * |
| Fluoroscopy time (min)               | 5 (3–8)           | 8 (5–12)         | 6 (2–12)                  | 4 (2–6)                    | 4 (2–8)                    | <0.001 * |
| Number of guidewires                 | 0 (0–1)           | 1 (0–1)          | 1 (0–1)                   | 0 (0–1)                    | 0 (0–1)                    | <0.001 * |
| Use of at least 1 guide-wire         | 127 (46%)         | 35 (62%)         | 14 (70%)                  | 53 (49%)                   | 25 (28%)                   | <0.001 + |

  

| L.M.                                 | Proximal (n = 71) |                  |                          | Antecubital (n = 60)      |                            | p-Value  |
|--------------------------------------|-------------------|------------------|--------------------------|---------------------------|----------------------------|----------|
|                                      | All (n = 131)     | Femoral (n = 62) | Internal Jugular (n = 9) | Left Antecubital (n = 39) | Right Antecubital (n = 21) |          |
| Radiation dose (cGy/m <sup>2</sup> ) | 43 (22–89)        | 60 (22–124)      | 79 (19–120.5)            | 31 (22–46)                | 42 (7.5–64)                | <0.001 * |
| Fluoroscopy time (min)               | 4 (2–7)           | 5 (3–8)          | 6 (2.5–8.5)              | 3 (2–6)                   | 4 (2.5–7.5)                | 0.057 *  |
| Number of guidewires                 | 0 (0–1)           | 0 (0–1)          | 0 (0–1)                  | 1 (0–1)                   | 0 (0–1)                    | 0.456 §  |
| Use of at least 1 guide-wire         | 62 (47%)          | 28 (45%)         | 4 (44%)                  | 20 (51%)                  | 10 (47%)                   | 0.853 +  |

  

| F.C.                                 | Proximal (n = 36) |                  |                          | Antecubital (n = 34)      |                           | p-Value |
|--------------------------------------|-------------------|------------------|--------------------------|---------------------------|---------------------------|---------|
|                                      | All (n = 70)      | Femoral (n = 33) | Internal Jugular (n = 3) | Left Antecubital (n = 27) | Right Antecubital (n = 7) |         |
| Radiation dose (cGy/m <sup>2</sup> ) | 32 (16–62)        | 37 (18.5–58)     | 243 (187–398)            | 27 (14.5–61)              | 16 (9–33.5)               | 0.042 § |
| Fluoroscopy time (min)               | 3 (2–4)           | 3 (2–6)          | 4 (3.5–7.5)              | 2 (2–4)                   | 3 (2–9)                   | 0.137 § |
| Number of guidewires                 | 1 (0–1)           | 0 (0–1)          | 0 (0–1)                  | 1 (0–1)                   | 1 (0–2)                   | 0.066 § |
| Use of at least 1 guide-wire         | 37 (53%)          | 15 (45%)         | 1 (33%)                  | 16 (59%)                  | 5 (83%)                   | 0.751 + |

  

| G.T.                                 | Proximal (n = 8) |                 |                          | Antecubital (n = 14)     |                           | p-Value |
|--------------------------------------|------------------|-----------------|--------------------------|--------------------------|---------------------------|---------|
|                                      | All (n = 22)     | Femoral (n = 4) | Internal Jugular (n = 4) | Left Antecubital (n = 7) | Right Antecubital (n = 7) |         |
| Radiation dose (cGy/m <sup>2</sup> ) | 32 (13–139.5)    | 97 (22–182.5)   | 176 (75–241.5)           | 31 (14–82)               | 18 (11–35)                | 0.032 § |
| Fluoroscopy time (min)               | 4.5 (2.5–9)      | 6 (4.5–8)       | 10 (6–11)                | 3 (2–5)                  | 3 (2–6)                   | 0.050 § |
| Number of guidewires                 | 0.5 (0–1)        | 1 (0.5–1.5)     | 1 (0.5–1)                | 0 (0–0)                  | 1 (0–2)                   | 0.098 § |
| Use of at least 1 guide-wire         | 10 (45%)         | 4 (100%)        | 1 (25%)                  | 1 (14%)                  | 4 (56%)                   | 0.762 + |

  

| L.B.                                 | Proximal (n = 8) |                 |                          | Antecubital (n = 12)     |                           | p-Value |
|--------------------------------------|------------------|-----------------|--------------------------|--------------------------|---------------------------|---------|
|                                      | All (n = 20)     | Femoral (n = 8) | Internal Jugular (n = 0) | Left Antecubital (n = 9) | Right Antecubital (n = 3) |         |
| Radiation dose (cGy/m <sup>2</sup> ) | 24 (12–44)       | 33.5 (15–44)    |                          | 24 (14–61)               | 23 (7–56)                 | 0.431 * |
| Fluoroscopy time (min)               | 4 (2–6)          | 3 (2–4.5)       |                          | 4 (5–2)                  | 6 (4–6)                   | 0.155 * |
| Number of guidewires                 | 1 (0–1)          | 1 (0.5–1)       |                          | 0 (0–1)                  | 0 (0–1)                   | 0.143 § |
| Use of at least 1 guide-wire         | 10 (47%)         | 6 (75%)         |                          | 2 (22%)                  | 1 (33%)                   | 0.808 + |

*p*-Value refers to the comparison between proximal and antecubital accesses. Student's T-test was used in the case of normally distributed variables; Kruskal-Wallis was used for non-normally distributed; Chi-Square test was used for non-continuous variables. \* Normally distributed variables (Student's T-test). § Non-normally distributed values (Kruskal-Wallis). + Frequencies compared with Chi-Square test.

**Table S2.** Baseline and procedural characteristics comparing femoral, internal jugular and antecubital approach.

| Baseline Characteristics             | All<br>( <i>n</i> = 515) | Femoral<br>( <i>n</i> = 163) | Internal Jugular<br>( <i>n</i> = 36) | Antecubital<br>( <i>n</i> = 316) | <i>p</i> -Value |
|--------------------------------------|--------------------------|------------------------------|--------------------------------------|----------------------------------|-----------------|
| Gender (male, %)                     | 161 (31.3%)              | 51 (31.3%)                   | 19 (52.8%)                           | 95 (30.1%)                       | 0.245 +         |
| Age (years)                          | 54 ± 19                  | 49 ± 22                      | 57 ± 14                              | 57 ± 17                          | <0.01 *         |
| Weight (kg)                          | 61.8 ± 14.1              | 59.6 ± 14.5                  | 65.6 ± 14.4                          | 62.6 ± 13.7                      | 0.027 *         |
| Height (cm)                          | 164 ± 9                  | 163 ± 9                      | 164 ± 10                             | 164 ± 9                          | 0.265 *         |
| BMI (kg/m <sup>2</sup> )             | 23.0 ± 4.4               | 22.4 ± 4.5                   | 24.2 ± 4.5                           | 23.2 ± 4.3                       | 0.060 *         |
| Radiation dose (cGy/m <sup>2</sup> ) | 38 (18–79)               | 59 (27–126)                  | 112 (31–189)                         | 30 (15–55)                       | <0.001 §        |
| Fluoroscopy time (min)               | 4 (2–8)                  | 5 (3–10)                     | 6 (3–11)                             | 3 (2–6)                          | <0.001 §        |
| Number of guidewires                 | 0 (0–1)                  | 1 (0–1)                      | 1 (0–1)                              | 0 (0–1)                          | 0.033 §         |
| Use of at least 1 guide-wire         | 246 (47.8%)              | 88 (54.0%)                   | 21 (58.3%)                           | 137 (43.4%)                      | 0.030 +         |

Data are represented as mean (standard deviation) for normally distributed variables and as median (interquartile ranges) for non-normally distributed variables. \* Normally distributed variables compared with ANOVA. § Non-normally distributed values compared with Kruskal-Wallis. + Frequencies compared with Chi-Square test.
